# Supplementary material for: Role of the HDAC6/STAT3 pathway in regulating PD-L1 expression in osteosarcoma cell lines
Source: Springer Nature journal article supplement (doi:10.1007/s00280-018-3721-6), 2018-11-14

**Supplemental Figure Legends**

**Supplemental Figure S1. The knockdown effect on target protein by HDAC6 shRNAs.** (A) Results of Western blotting of HDAC6 expression after different HDAC6 shRNAs transfection in MG63 cells. (B) Quantitative analysis results of Western blotting. *, *P*<0.05 *v.s.* Con. #, *P*<0.05 *v.s.* NC.


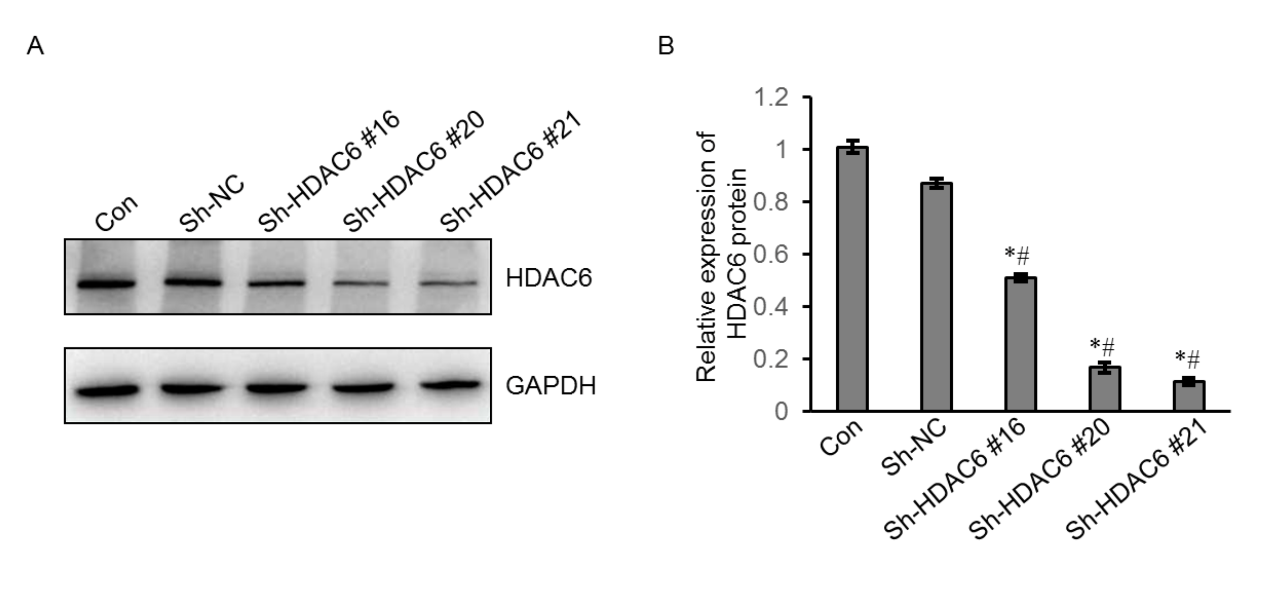


**Supplemental Figure S2. The effect of another HDAC6 shRNA transfection on PD-L1 expression.** (A) Results of Western blotting on sh-NC- and sh-HDAC6 #20-transfected MG63, U2OS and SaOS-2 osteosarcoma cells under IL-6 stimulation (30 ng/mL). (B) qRT-PCR analysis of *PD-L1* mRNA expression in Sh-NC- and Sh-HDAC6 #20-transfected osteosarcoma cells treated with IL-6 or control. These results were expressed as a percent over control cells, and data were normalized by *gapdh* expression. *, *P*<0.05. (C) PD-L1 expression was measured using flow cytometry in Sh-NC- and Sh-HDAC6 #20-transfected osteosarcoma cell lines with or without IL-6 stimulation.


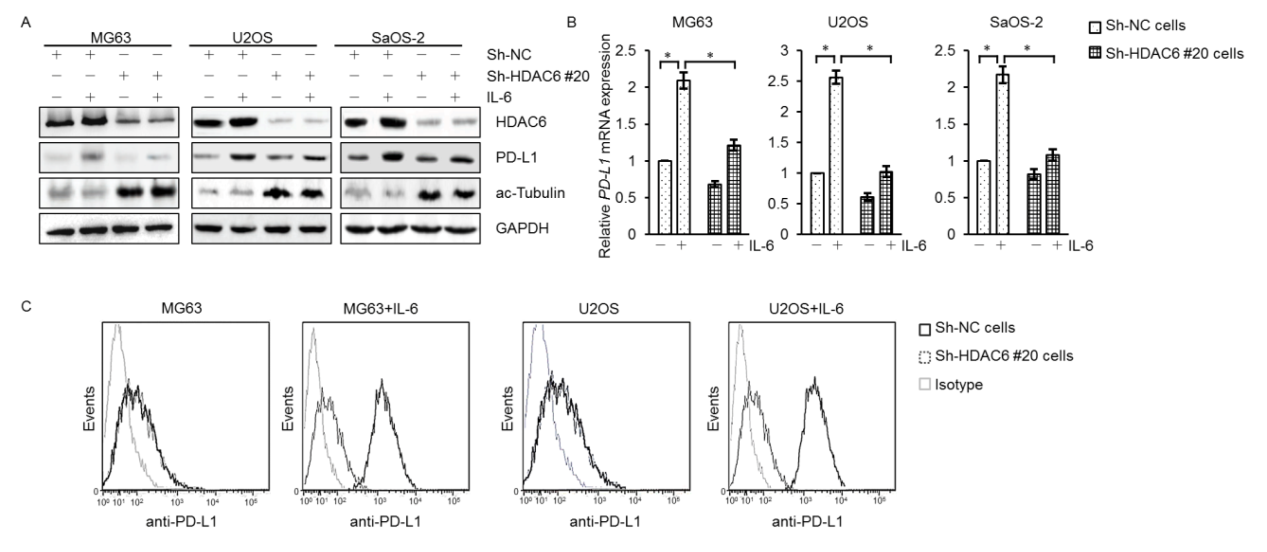

Supplement: MOESM1 [file 16271382]
